# Supplementary material for: MYC activation and BCL2L11 silencing by a tumour virus through the large-scale reconfiguration of enhancer-promoter hubs
Source: eLife journal article supplement (doi:10.7554/elife.18270), 2016-08-04
Supplement: supp [file elife_poa_e18270_Supplementary_File_3.xlsx]

## Sheet: Sheet1
Circularised Chromosome Conformation Capture	ID	Description	Sequence
	MYC P5 TSBC01	TSBC01 ATCACG	AATGATACGGCGACCACCGAGAACACTCTTTCCCTACACGACGCTCTTCCGATCTATCACGAGCTGCTGGGAGGAGACATG
	MYC P5 TSBC02	TSBC02 CGATGT	AATGATACGGCGACCACCGAGAACACTCTTTCCCTACACGACGCTCTTCCGATCTCGATGTAGCTGCTGGGAGGAGACATG
	MYC P5 TSBC04	TSBC04 TGACCA	AATGATACGGCGACCACCGAGAACACTCTTTCCCTACACGACGCTCTTCCGATCTTGACCAAGCTGCTGGGAGGAGACATG
	MYC P5 TSBC05	TSBC05 ACAGTG	AATGATACGGCGACCACCGAGAACACTCTTTCCCTACACGACGCTCTTCCGATCTACAGTGAGCTGCTGGGAGGAGACATG
	MYC P5 TSBC06	TSBC06 GCCAAT	AATGATACGGCGACCACCGAGAACACTCTTTCCCTACACGACGCTCTTCCGATCTGCCAATAGCTGCTGGGAGGAGACATG
	MYC P5 TSBC07	TSBC07 CAGATC	AATGATACGGCGACCACCGAGAACACTCTTTCCCTACACGACGCTCTTCCGATCTCAGATCAGCTGCTGGGAGGAGACATG
	MYC P5 TSBC10	TSBC10 TAGCTT	AATGATACGGCGACCACCGAGAACACTCTTTCCCTACACGACGCTCTTCCGATCTTAGCTTAGCTGCTGGGAGGAGACATG
	MYC P5 TSBC12	TSBC12 CTTGTA	AATGATACGGCGACCACCGAGAACACTCTTTCCCTACACGACGCTCTTCCGATCTCTTGTAAGCTGCTGGGAGGAGACATG
	MYC P5 TSBC20	TSBC20 GTGGCC	AATGATACGGCGACCACCGAGAACACTCTTTCCCTACACGACGCTCTTCCGATCTGTGGCCAGCTGCTGGGAGGAGACATG
	MYC P7		CAAGCAGAAGACGGCATACGACCACGTCCTAACACCTCTAG
Chromosome Conformation Capture	MW1312	MYC promoter	TGCAGAAGGTCCGAAGAAAG
	MW1315	MYC 168/186 4	GGAGCATGCAAGAGGAAGAC
	MW1321	MYC 168/186 3	CTGGAATGCGAGAAGGTAGC
	MW1324	MYC 168/186 2	AATGGCAACAGAGGGACAAG
	MW1330	MYC 168/186 1	GGTTCCTGACACTCCATTCC
	MW1348	MYC 566 1	GGACTGTGATGTGGGTGAGA
	MW1351	MYC 566 2	CACACAGGGCAAGTCAGATG
	MW1369	MYC 566 3	TTGTCATCAGTCTCACGGCA
	MW1540	MYC 1.8	CCAACCTACCTTGTCACCCT
	MW1409	MYC 556 CTCF left	CAGTGACGGCTTGCTGAATT
	MW1410	MYC 556 CTCF right	ACACGTACCCCTGCTATGTT
	MW1411	MYC control	TGGTGCTGGAATAATTGGCA
	MW1204	BCL2L11 promoter	CATGAAAATGCTCCCCCATA
	MW1206	ACOXL promoter	GATTTGAGGCAAGCAGAAGG
	MW1205	ACOXL 1	TGTTGCTTAGGGGATTGGAG
	MW1207	ACOXL 2	ATGTTACCATTGGGCGAAAC
	MW1208	ACOXL 3	CTCAAGTGATCTGCCCACCT
	MW1211	BCL2L11 control	TTGCCATGGGTTTAATGTCA
	MW1222	BCL2L11 4	CCCCACAAAACCAACTTCAT
	MW1223	BCL2L11 5	GTGGGAGGTGACTGGATCAT
	MW1224	BCL2L11 6	CCTGAAGACGCAAGAAGACC
	MW1579	BCL2L11 C4	AAGCTGACATCTGGACTCCC
	MW1580	BCL2L11 C3	GGCTCAGTGTTCTTTCCTGC
	MW1581	BCL2L11 C2	ACAGGCGTAGAGACCAATGG
