# Supplementary material for: MYC activation and BCL2L11 silencing by a tumour virus through the large-scale reconfiguration of enhancer-promoter hubs
Source: eLife journal article supplement (doi:10.7554/elife.18270), 2016-08-04
Supplement: supp [file elife_poa_e18270_Supplementary_File_4.xlsx]

## Sheet: Sheet1
	ID	Description	Sequence
RT-QPCR Primers	MW1447	QPCR B2M f	TTAGCTGTGCTCGCGCTACTCT
	MW1448	QPCR B2M r	TGGTTCACACGGCAGGCATACT
	MW1557	QPCR ACOXL f	CATGGCCAGCACGAGGAT
	MW1558	QPCR ACOXL r	CGTGGAGGTAGGTGTGTGG
	MW1132	QPCR CD21 f	TCTTGGCTCTCGTCGCAC
	MW1133	QPCR CD21 r	TTATCACGGTACCAACAGCAATG
	MW417	QPCR Actin f	CTGGCACCACACCTTCTACA
	MW418	QPCR Actin r	TAGCACAGCCTGGATAGCAA
	MW1127	QPCR MYC f	TCAAGAGGTGCCACGTCTCC
	MW1128	QPCR MYC r	TCTTGGCAGCAGGATAGTCCTT
	MW1522	QPCR BimEL f	GCTGTCTCGATCCTCCAGTG
	MW1523	QPCR BimEL r	GTTAAACTCGTCTCCAATACG
	MW84	QPCR GAPDH f	TCAAGATCATCAGCAATGCC
	MW85	QPCR GAPDH r	CATGAGTCCTTCCACGATACC
	MW486	QPCR ADAMDEC 1 f	AGA TCC ACG ACC ATG CTC AGC T
	MW487	QPCR ADAMDEC 1 r	GTG ACA TCA CTC CTA CAA GAG CC
ChIP QPCR Primers	MW1405	QPCR MYC P2 promoter f	CCGCATCCACGAAACTTTG
	MW1406	QPCR MYC P2 promoter r	GGGTGTTGTAAGTTCCAGTGCAA
	MW1375	QPCR MYC 1.8 f	TGACCACTACCTCTGCCAGA
	MW1376	QPCR MYC 1.8 r	TGGATTCGGAAGCTGGTGAG
	MW1379	QPCR MYC 168/186 f	ACACTGTCAGATCTTCAGGCTC
	MW1380	QPCR MYC 168/186 r	ATGCGAGGTGGTCATCTTCA
	MW1381	QPCR MYC 428 f	TCATTGAAGGAGGCATGTGTCA
	MW1382	QPCR MYC 428 r	TGTGCTCAAGTGTGTCTGGT
	MW1383	QPCR MYC 556 3 f	CAGGCATCCTCTTCTGGTCC
	MW1384	QPCR MYC 556 3 r	TTAGTTGAGGCGGCATGTGT
	MW1385	QPCR MYC 556 1 f	CTGCAAGCCATAATTCTCAGCC
	MW1386	QPCR MYC 556 1 r	CCTCTCTGTGTGTCCTTGTGT
	MW1387	QPCR MYC 556 control f	ACTTCAAGCACGTGACCAGT
	MW1388	QPCR MYC 556 control r	TTACATACAGGCTTGCATTGCTT
	MW1389	QPCR BIM e6 f	ACAGCAGCATGTGGACGAA
	MW1390	QPCR BIM e6 r	TATGTGTAGCCAGGTGAGCC
	MW1391	QPCR BIM e5 f	CCACACCAACTCCTGAGGTT
	MW1392	QPCR BIM e5 r	ACTGTGTGTGCATGTGTGTG
	MW1393	QPCR BIM e4 f	AGGCCTCAGAGTCCACAGT
	MW1394	QPCR BIM e4 r	TCCAGCACCTCTACCTGTTG
	MW1395	QPCR BIM pro f	CTGGTCTGCAGTTTGTTGGA
	MW1396	QPCR BIM pro r	GGTGGCTGCAAGAATCAAGT
	MW1397	QPCR BIM e3 f	AGGCAGAGCACTTCATCACA
	MW1398	QPCR BIM e3 r	CCTCCAGTGTCAGAGAAGATGAA
	MW1399	QPCR BIM e2 f	TGCCATCAGAAGCAAGCTCT
	MW1400	QPCR BIM e2 r	ATCAAGGAGCAGAGCAGGTG
	MW1401	QPCR BIM e1 f	TGGTTCAGAGCTTGCAGTGT
	MW1402	QPCR BIM e1 r	ACCTGCACAGCCTGATGAAT
	MW1403	QPCR ACOXL promoter f	CCTACCACCAAGCTTCCTGT
	MW1404	QPCR ACOXL promoter r	TGGCGAGTCATTCCTCTGTC
