# Supplementary material for: MYC activation and BCL2L11 silencing by a tumour virus through the large-scale reconfiguration of enhancer-promoter hubs
Source: eLife. 2016 Aug 4;5:e18270. doi: 10.7554/eLife.18270 (PMC5005034; doi:10.7554/eLife.18270)
Supplement: Supplementary file 1. — DOI: http://dx.doi.org/10.7554/eLife.18270.016 [file elife-18270-supp1.xlsx]

## Sheet: Sheet1
	ID	Chr	Start	End	Size	Cell Type	Tissue
-556	SE_34619	chr8	128208683	128241797	33114	HeLa	Cervial cancer
	SE_56730	chr8	128207751	128318600	110849	VACO 400	Colorectal Cancer
	SE_34241	chr8	128208736	128320580	111844	HCT-116	Colorectal Cancer
	SE_32491	chr8	128190704	128239822	49118	GM12878	Blood Cancer (EBV infected B Cell)
	SE_33867	chr8	128218029	128238902	20873	HCC1954	Breast Cancer
	SE_10339	chr8	128180645	128229021	48376	CD19 Primary	Blood (B Cell)
	SE_36159	chr8	128216878	128239096	22218	HMEC	Mammary Epithelial
	SE_59192	chr8	128182043	128240483	58440	Ly3	Diffuse Large B Cell Lymphoma
	SE_64756	chr8	128217122	128238512	21390	NHEK	Skin
	SE_62747	chr8	128180457	128238521	58064	Tonsil	Tonsil
	SE_18966	chr8	128180526	128229659	49133	CD4p CD25- Il17- PMAstim Th	Blood (T Cell)
	SE_11739	chr8	128180346	128229384	49038	CD20	Blood (B Cell)
-428	SE_63280	chr8	128308182	128341942	33760	NCI-H82	Lung Cancer
	SE_56730	chr8	128207751	128318600	110849	VACO 400	Colorectal Cancer
	SE_34241	chr8	128208736	128320580	111844	HCT-116	Colorectal Cancer
	SE_32670	chr8	128298980	128321170	22190	GM12878	Blood Cancer (EBV infected B Cell)
	SE_36156	chr8	128304307	128320683	16376	HMEC	Mammary Epithelial
-1.10714	SE_56902	chr8	128573052	128619466	46414	VACO 400	Colorectal Cancer
	SE_59050	chr8	128560866	128582439	21573	Ly3	Diffuse Large B Cell Lymphoma
450	SE_33773	chr8	129153748	129219173	65425	HCC1954	Breast Cancer
	SE_58836	chr8	129158962	129219148	60186	Ly3	Diffuse Large B Cell Lymphoma
	SE_43415	chr8	129147244	129191727	44483	MCF-7	Breast Cancer
	SE_61061	chr8	129159080	129218964	59884	HBL1	Diffuse Large B Cell Lymphoma
	SE_51829	chr8	129179643	129210014	30371	Skeletal Muscle Myoblast	Skeletal Muscle
	SE_63618	chr8	129179643	129210119	30476	HSMM	Skeletal Muscle
	SE_45777	chr8	129179447	129215108	35661	Osteoblasts	Bone
	SE_02537	chr8	129180089	129198014	17925	Astrocytes	Astrocyte
	SE_55974	chr8	129165089	129210112	45023	U87	Brain Cancer
	SE_38266	chr8	129179300	129198539	19239	HUVEC	Umbilical Vein
	SE_37307	chr8	129163751	129203247	39496	HSMMtube	Skeletal Muscle
	SE_64660	chr8	129179715	129198151	18436	NHEK	Skin
	SE_44676	chr8	129179902	129198300	18398	NHDF-Ad	Skin
	SE_36562	chr8	129179996	129198145	18149	HMEC	Mammary Epithelial
570	SE_64015	chr8	129332744	129345422	12678	HSMM	Muscle
	SE_52258	chr8	129332773	129337966	5193	Skeletal Muscle Myoblast	Skeletal Muscle
1.8	SE_25360	chr8	130540059	130609405	69346	DND41	Blood cancer (T Cell Leukaemia)
	SE_39973	chr8	130564436	130604313	39877	K562	Blood Cancer (Erythroleukaemia)
	SE_61629	chr8	130547154	130570943	23789	Toledo	Diffuse Large B Cell Lymphoma
	SE_39589	chr8	130540472	130572787	32315	Jurkat	Blood Cancer (T Cell Leukaemia)
	SE_13667	chr8	130547993	130606982	58989	CD34 Primary RO01536	Blood
