# Supplementary material for: MYC activation and BCL2L11 silencing by a tumour virus through the large-scale reconfiguration of enhancer-promoter hubs
Source: eLife. 2016 Aug 4;5:e18270. doi: 10.7554/eLife.18270 (PMC5005034; doi:10.7554/eLife.18270)
Supplement: Supplementary file 2. — DOI: http://dx.doi.org/10.7554/eLife.18270.017 [file elife-18270-supp2.xlsx]

## Sheet: Sheet1
	ID	Chr	Start	End	Size	Cell Type	Tissue
1	SE_44060	chr2	111501134	111513690	12556	MM1S	Blood Cancer (multiple myeloma)
(-374)
4
(+310)	SE_14375	chr2	112157481	112255469	97988	CD4 Memory Primary 7pool	Blood
	SE_20734	chr2	112162754	112254532	91778	CD8 Memory 7pool	Blood
	SE_16282	chr2	112168763	112254339	85576	CD4 Naive Primary 8pool	Blood
	SE_18238	chr2	112157652	112265683	108031	CD4p CD25- Il17- PMAstim Th	Blood
	SE_11821	chr2	112158863	112265495	106632	CD3	Blood
	SE_15396	chr2	112176265	112253574	77309	CD4 Memory Primary 8pool	Blood
	SE_10166	chr2	112174042	112223214	49172	CD19 Primary	Blood
	SE_19110	chr2	112158019	112265386	107367	CD4p CD25- Il17p PMAstim Th17	Blood
	SE_19985	chr2	112169291	112265583	96292	CD56	Blood
	SE_13332	chr2	112163592	112254907	91315	CD34 Primary RO01536	Blood
	SE_22299	chr2	112169317	112265674	96357	CD8 primary	Blood
	SE_17781	chr2	112158060	112254358	96298	CD4p CD25- CD45ROp Memory	Blood
	SE_52359	chr2	112168357	112265393	97036	Small Intestine	Small Intestine
	SE_45566	chr2	112147614	112262980	115366	Osteoblasts	Bone
	SE_50094	chr2	112172847	112265663	92816	Sigmoid Colon	Colon Cancer
	SE_25821	chr2	112185074	112256327	71253	Duodenum Smooth Muscle	Small Intestine
	SE_53336	chr2	112167275	112265338	98063	Spleen	Spleen
	SE_10899	chr2	112170769	112241385	70616	CD20	Blood
	SE_25382	chr2	112165529	112254103	88574	DND41	Blood Cancer (T Cell Leukaemia)
	SE_16917	chr2	112177556	112253231	75675	CD4p CD225int CD127p Tmem	Blood
	SE_15872	chr2	112181378	112222002	40624	CD4 Naive Primary 7pool	Blood
	SE_09255	chr2	112167172	112262739	95567	CD14	Blood
	SE_49967	chr2	112181305	112223052	41747	RPMI-8402	Blood Cancer
	SE_55233	chr2	112158483	112221903	63420	Thymus	Thymus
	SE_39501	chr2	112163354	112222381	59027	Jurkat	Blood Cancer (T Cell Leukaemia)
	SE_00172	chr2	112188123	112256428	68305	Adipose Nuclei	Adipose
	SE_21622	chr2	112181341	112222622	41281	CD8 Naive 7pool	Blood
	SE_22092	chr2	112180826	112253444	72618	CD8 Naive 8pool	Blood
	SE_51387	chr2	112172398	112256063	83665	Skeletal Muscle	Skeletal Muscle
	SE_31329	chr2	112173278	112253680	80402	Fetal Thymus	Fetal Thymus
5
(+427)	SE_64420	chr2	112289234	112304339	15105	NHEK	Skin
6
(+587)	SE_61452	chr2	112415885	112469307	53422	Toledo	Diffuse Large B Cell Lymphoma
	SE_57960	chr2	112455670	112468084	12414	VACO 9m	Colorectal Cancer
	SE_25508	chr2	112455275	112495377	40102	DND41	Blood Cancer (T cell Leukaemia)
	SE_43722	chr2	112455307	112467866	12559	MM1S	Blood Cancer (B Lymphocyte)
	SE_58779	chr2	112425773	112468813	43040	Ly1	Diffuse Large B Cell Lymphoma
